# Supplementary material for: LEF1 Enhances the Progression of Colonic Adenocarcinoma via Remodeling the Cell Motility Associated Structures
Source: MDPI journal article supplement (doi:10.3390/ijms221910870), 2021-10-08
Supplement: s1 [file s1]

## Supplemental Materials

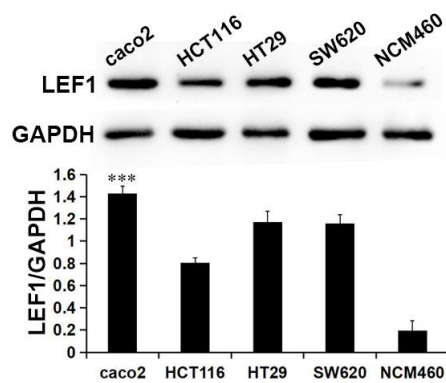

Figure S1. LEF1 protein expressions in colon cancer cells and human intestinal epithelial cells. \*\*\* $P < 0.01$ .
